# Supplementary material for: Effects of Food Types, Frying Frequency, and Frying Temperature on 3-Monochloropropane-1,2-diol Esters and Glycidyl Esters Content in Palm Oil during Frying
Source: MDPI journal article supplement (doi:10.3390/foods10102266), 2021-09-24
Supplement: s1 [file s1]

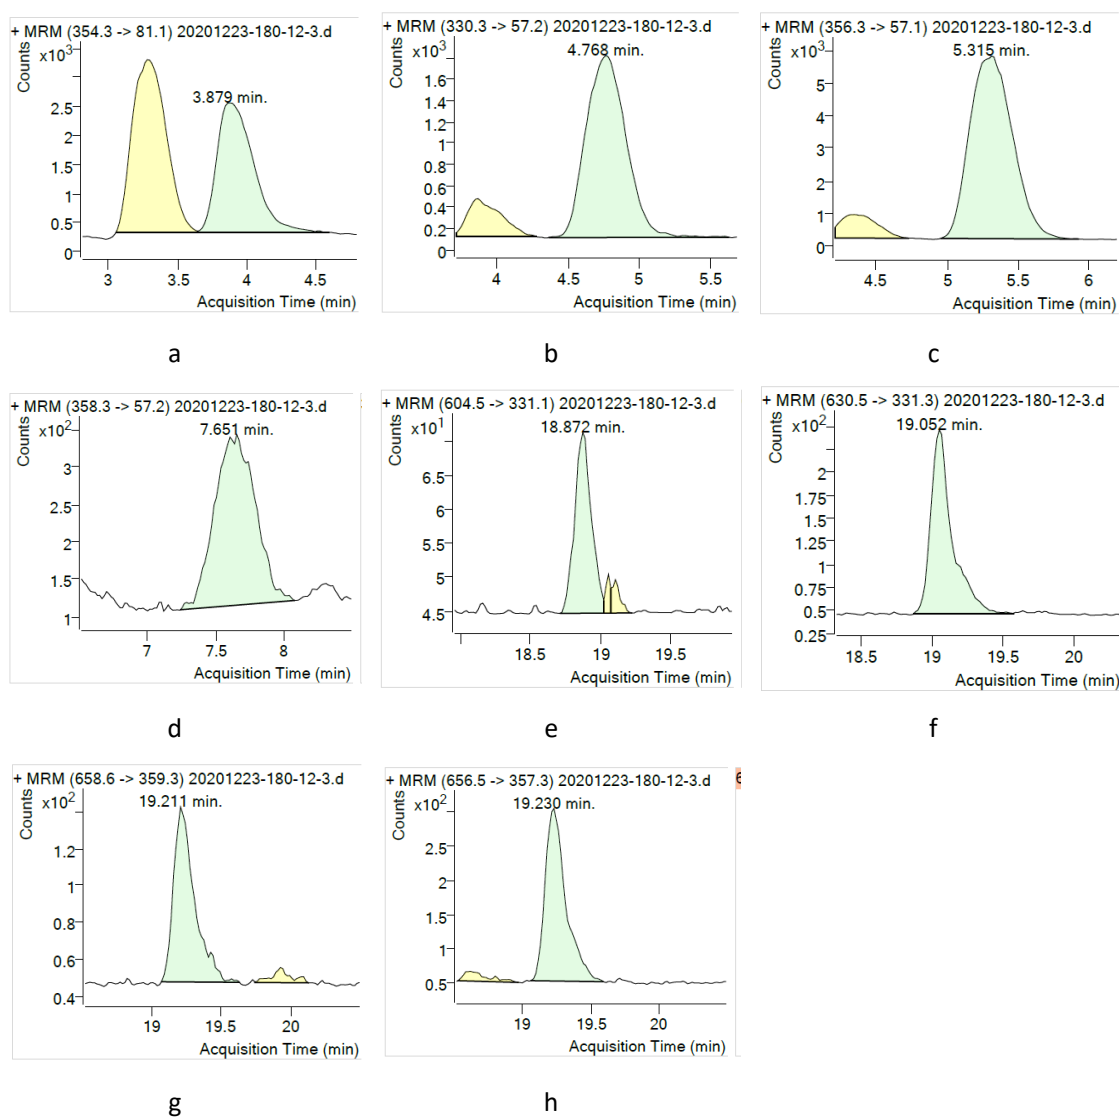

**Figure S1.** Extracted ion chromatogram of: (a) Li-GE, (b) Pa-GE, (c) Ol-GE, (d) St-GE, (e) Pa-Pa, (f) Ol-Pa, (g) Ol-St, (h) Ol-Ol in the fried palm olein sample after frying 12 h at 180°C

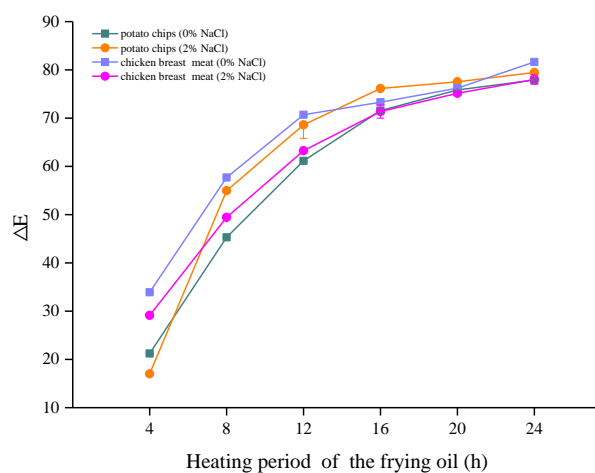

**Figure S2.**  $\Delta E$  value in fried oils of different heating period after frying potato chips and chicken breast

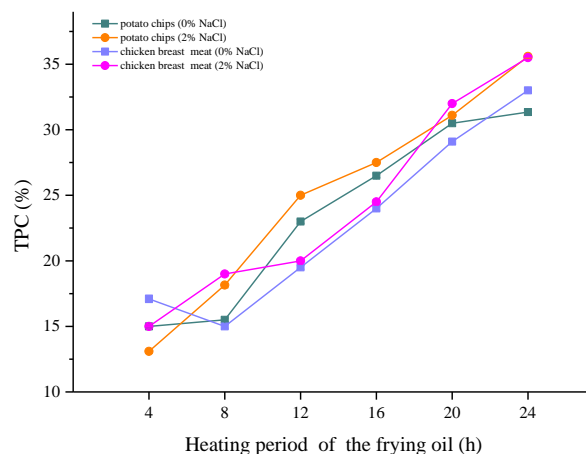

**Figure S3.** TPC amount in fried oils of different heating period after frying potato chips and chicken breast

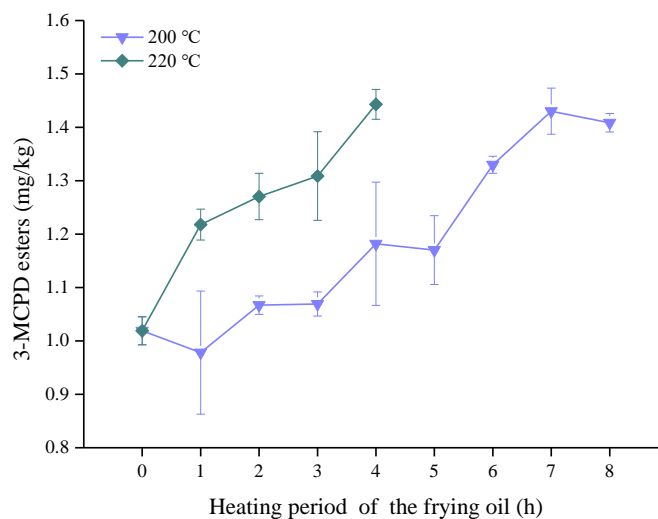

**Figure S4.** Contents of 3-MCPDE in fried oils after frying chicken breast at 220 °C for 0-4h and at 200 °C for 0-8 h

**Table S1.** Fatty acid profile (g/100 g lipid) of palm oil

| Fatty acids                   | Contribution* (relative percentages) |
|-------------------------------|--------------------------------------|
| Lauric acid (C12:0)           | 0.16±0.01                            |
| Tetradecanoic acid (C14:0)    | 0.68±0.01                            |
| Palmitic acid (C16:0)         | 29.10±0.10                           |
| Palmitoleic acid (C16:1)      | 0.15±0.01                            |
| Stearic acid (C18:0)          | 2.68±0.01                            |
| cis-9-Oleic acid (C18:1)      | 49.50±0.30                           |
| Linoleic acid (C18:2)         | 13.20±0.10                           |
| cis-11-Ecosenoic acid (C20:1) | 0.18±0.01                            |
| Linolenic acid (C18:3)        | 0.20±0.01                            |
| Total                         | 95.85                                |

\*All values are averages ± standard deviation of triplicate analysis

**Table S2.** Calibration curves, correlation coefficients (r), LODs and LOQs for GEs and 3-MCPDE

| Compounds | Linear range<br>(mg/L) | R <sup>2</sup> | Calibration equation  | LOQ<br>(mg/kg) | LOD<br>(mg/kg) |
|-----------|------------------------|----------------|-----------------------|----------------|----------------|
| Li-GE     | 0.05-1                 | 0.9998         | $y = 5.292x - 0.063$  | 0.020          | 0.004          |
| Pa-GE     | 0.05-1                 | 0.9989         | $y = 1.771x + 0.070$  | 0.005          | 0.0004         |
| Ol-GE     | 0.05-1                 | 0.9980         | $y = 10.865x + 1.270$ | 0.020          | 0.004          |
| St-GE     | 0.05-1                 | 0.9984         | $y = 0.844x + 0.069$  | 0.050          | 0.010          |
| Pa-Pa     | 0.01-1                 | 0.9992         | $y = 1.037x - 0.046$  | 0.001          | 0.0002         |
| Ol-Pa     | 0.01-1                 | 0.9942         | $y = 2.067x - 0.373$  | 0.0004         | 0.0002         |
| Ol-Ol     | 0.01-1                 | 0.9991         | $y = 0.867x - 0.045$  | 0.0004         | 0.0002         |
| Ol-St     | 0.01-1                 | 0.9991         | $y = 0.314x - 0.011$  | 0.001          | 0.0003         |

**Table S3.** Recovery and repeatability results of GEs and 3-MCPDE analysis

| Compounds | Spiked level (mg/kg) | *Recoveries (% , n=6) | RSD (%) |
|-----------|----------------------|-----------------------|---------|
| Li-GE     | 1                    | 96.5                  | 5.7     |
|           | 3                    | 81.3                  | 4.1     |
| Pa-GE     | 1                    | 93.1                  | 6.0     |
|           | 3                    | 84.5                  | 3.2     |
| Ol-GE     | 1                    | 101.4                 | 5.0     |
|           | 3                    | 106.4                 | 3.6     |
| St-GE     | 1                    | 95.0                  | 8.1     |
|           | 3                    | 91.4                  | 4.6     |
| Pa-Pa     | 1                    | 84.9                  | 7.3     |
|           | 3                    | 89.7                  | 5.1     |
| Ol-Pa     | 1                    | 103.0                 | 6.7     |
|           | 3                    | 95.9                  | 6.7     |
| Ol-Ol     | 1                    | 92.5                  | 3.9     |
|           | 3                    | 94.7                  | 2.0     |
| Ol-St     | 1                    | 89.0                  | 2.7     |
|           | 3                    | 90.8                  | 0.9     |

\*The recoveries are shown as the mean from six trials
